# Supplementary material for: Room-temperature NH3gas sensor based on atomically dispersed Co with a simple structure
Source: Royal Society of Chemistry journal article supplement (doi:10.1039/d1nj01139a), 2021-01-01
Supplement: d1nj01139a1.pdf [file d1nj01139a1.pdf]

# Room-temperature NH<sub>3</sub> gas sensor based on atomically dispersed Co

Renbing Tian<sup>a</sup>, Peng Ji<sup>a</sup>, Zhichao Luo<sup>b</sup>, Jiaming Li<sup>b</sup>, Jinghua Sun<sup>a\*</sup>

<sup>a</sup>School of Electrical Engineering & Intelligentization, Dongguan University of Technology, No.1 Daxue Rd, Dongguan, Guangdong Province, 523808, P. R. China

<sup>b</sup>Guangdong Provincial Key Laboratory of Nanophotonic Functional Materials and Devices, South China Normal University, Guangzhou, 510006, PR China

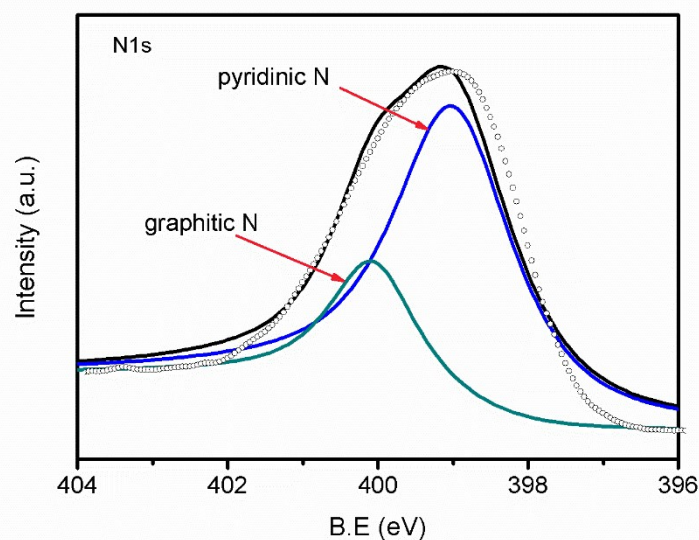

**Figure S1.** High resolution XPS spectrum of N 1s.

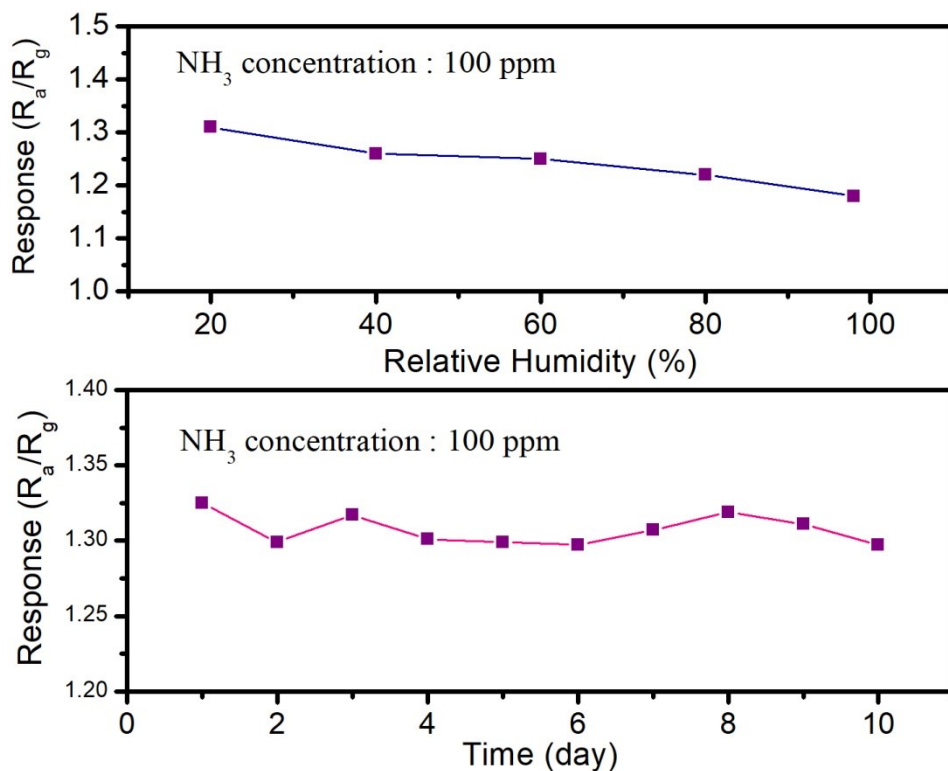

**Figure S2.** The effect of relative humidity on response values (a) and long-time stability (b) at room temperature.

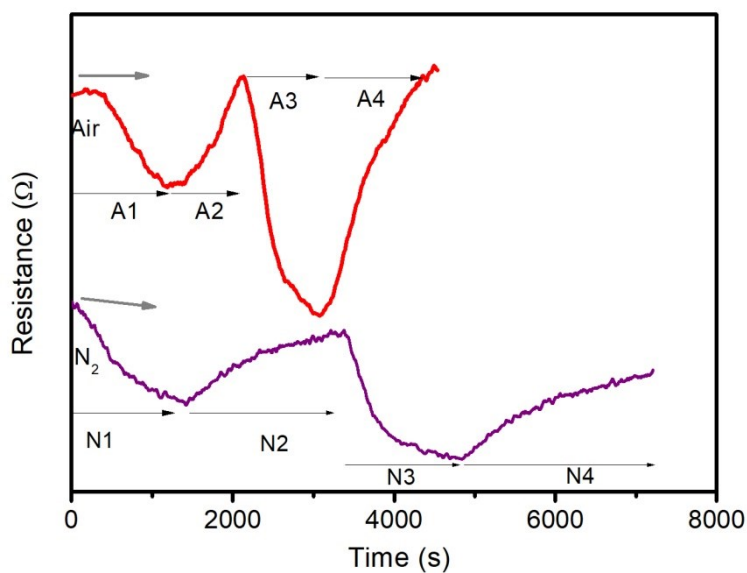

**Figure S3.** The response curves of SAC CoNC gas sensor to  $NH_3$  under air and nitrogen. A1 and N1 was the response stage while A2 and N2 was recovery stage in 20 ppm  $NH_3$ . A3 and N3 was the response stage while A4 and N4 was recovery stage in 50 ppm  $NH_3$ .
